# Supplementary material
Source: PubMed Central journal article supplement (PMC4187838)
Supplement: IAI.02194-14_zii999090865so1.pdf [file IAI.02194-14_zii999090865so1.pdf]

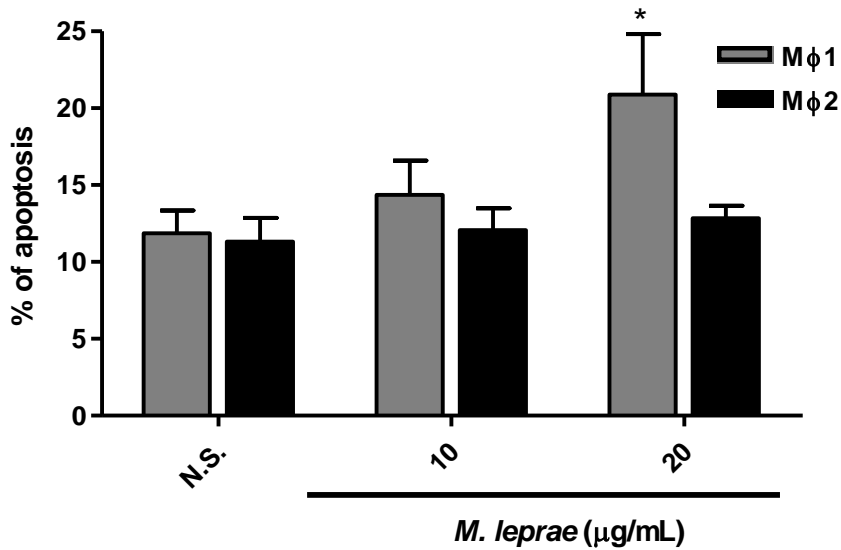

Fig. S1 - To evaluate whether *M. leprae* could induce apoptosis in Mφ1 or Mφ2 cells differentiated in vitro, cells were stimulated with irradiated *M. leprae* at 10 or 20 μg/mL for 24h; and the percentage of cell apoptosis was evaluated as the percentage of cells Annexin V<sup>+</sup> PI<sup>-</sup> by flow cytometry. Experiments were performed at least five times in triplicate and data were presented as mean ± SD. \*p<0.05 in relation to non-stimulated (N.S.) Mφ1 group.

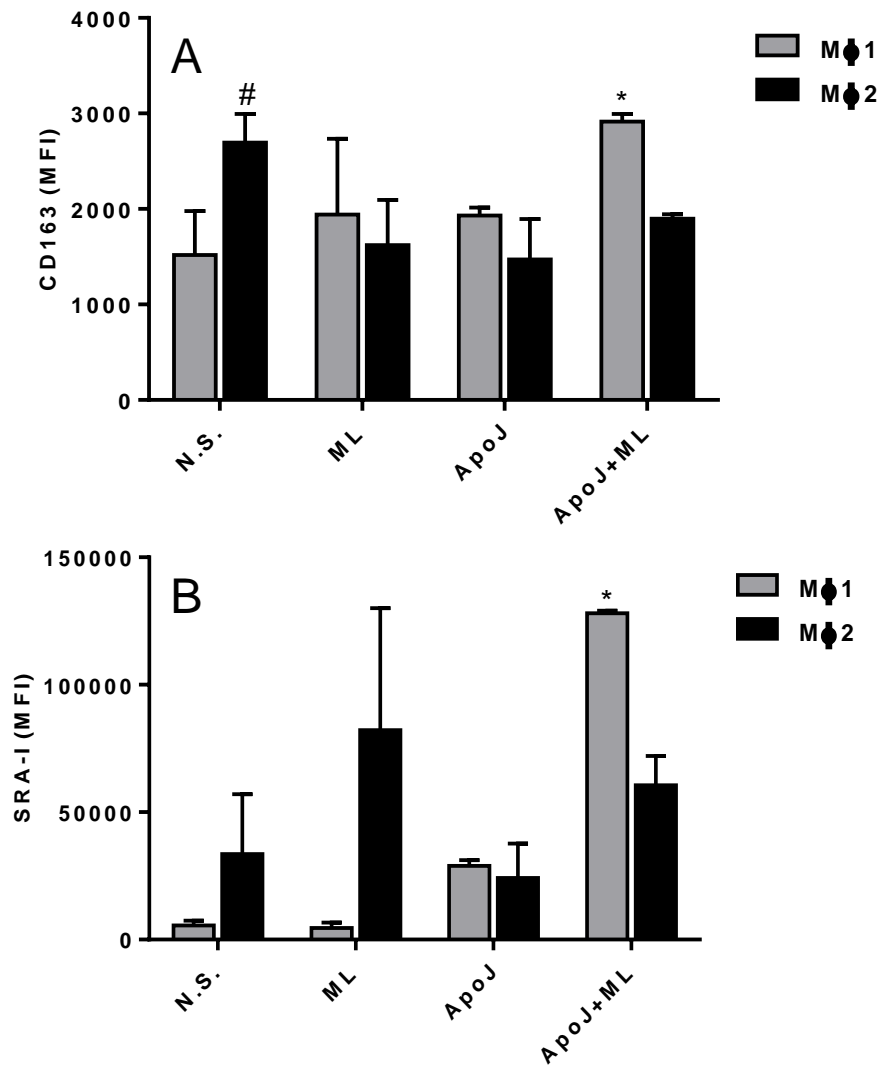

**Fig. S2** - Mφ1 or Mφ2 cells were stimulated with irradiated *M. leprae* at 10 μg/mL for 24h in the presence or absence of apoptotic Jurkat cells (1:1). CD163-APC (A) and SRA-I-PE (B) expression were evaluated by flow cytometry. The mean fluorescence intensity (MFI) was shown. Experiments were performed at least three times in triplicate and data were presented as mean ± SD. (A) \* p< 0.05 in relation to non-stimulated (N.S) Mφ1 cells and Mφ1+ApoJ. (B) \* p< 0.05 in relation to N.S., ML or ApoJ stimulated Mφ1 cells. #p<0.05 in relation Mφ1 cells.

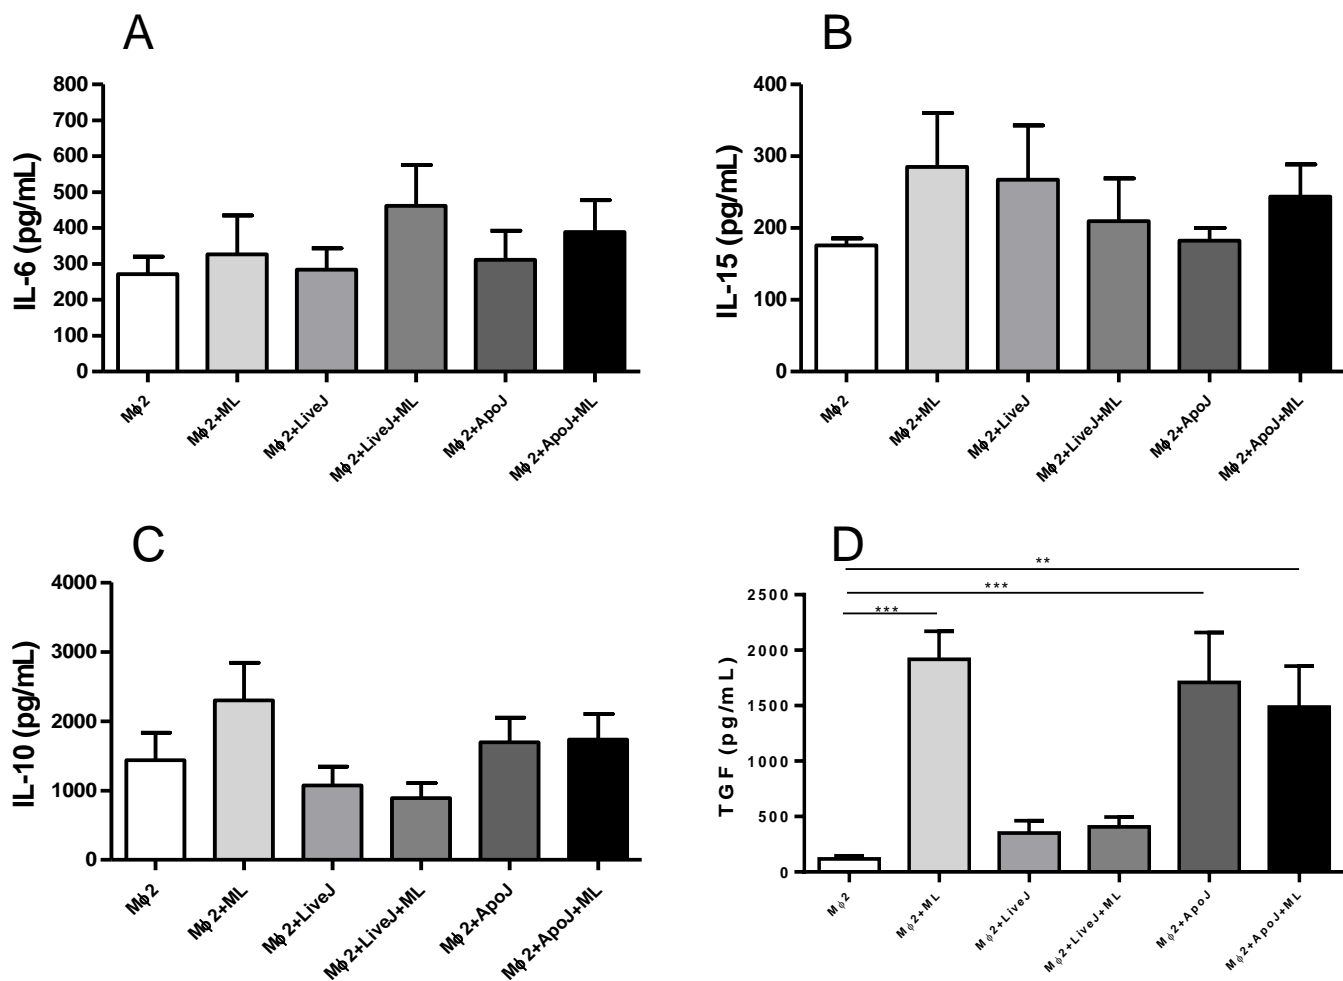

**Fig. S3** - Mφ2 cells were stimulated with irradiated *M. leprae* at 10 μg/mL for 24h in the presence or absence of apoptotic or live Jurkat cells (1:1); and the concentrations of IL-6 (A), IL-15 (B), and IL-10 (C), and TGF-β (D) in cell supernatants were evaluated by ELISA. Experiments were performed at least three times in triplicate. \* $p < 0.05$ , \*\*\* $p < 0.001$ .
